# Supplementary material
Source: HighWire-hosted journal article supplement (https://bmjopen.bmj.com/content/6/4/e010075)
Supplement: inline-supplementary-material-1 [file inline-supplementary-material-1.pdf]

**Supplementary Table 1: Outcome discrepancies between pre-specified (trial registry) and reported outcomes (initial submission) from trials submitted to The BMJ**

| Trials accepted by The BMJ (n=21 trials)                                                                               |                   |                                                     |                                                  |                                      |                                                |                                                          | Trials rejected by The BMJ (n=21 trials)                                                                               |                   |                                                     |                                                  |                                      |                                                |                                                          |
|------------------------------------------------------------------------------------------------------------------------|-------------------|-----------------------------------------------------|--------------------------------------------------|--------------------------------------|------------------------------------------------|----------------------------------------------------------|------------------------------------------------------------------------------------------------------------------------|-------------------|-----------------------------------------------------|--------------------------------------------------|--------------------------------------|------------------------------------------------|----------------------------------------------------------|
| Article ID                                                                                                             | Registration type | Discrepancy type                                    |                                                  |                                      |                                                |                                                          | Article ID                                                                                                             | Registration type | Discrepancy type                                    |                                                  |                                      |                                                |                                                          |
|                                                                                                                        |                   | Total number of outcomes pre-specified <sup>a</sup> | Pre-specified outcomes not reported <sup>b</sup> | New outcomes introduced <sup>c</sup> | Total number of outcomes reported <sup>d</sup> | Change in level of importance of an outcome <sup>e</sup> |                                                                                                                        |                   | Total number of outcomes pre-specified <sup>a</sup> | Pre-specified outcomes not reported <sup>b</sup> | New outcomes introduced <sup>c</sup> | Total number of outcomes reported <sup>d</sup> | Change in level of importance of an outcome <sup>e</sup> |
| A1                                                                                                                     | Prospective       | 9                                                   | 0                                                | 4                                    | 13                                             | 0                                                        | R1                                                                                                                     | Prospective       | 4                                                   | 0                                                | 2                                    | 6                                              | 0                                                        |
| A3                                                                                                                     | Prospective       | 8                                                   | 6                                                | 2                                    | 4                                              | 0                                                        | R4                                                                                                                     | Prospective       | 14                                                  | 1                                                | 4                                    | 17                                             | 0                                                        |
| A4                                                                                                                     | Prospective       | 20                                                  | 2                                                | 7                                    | 25                                             | 0                                                        | R6                                                                                                                     | Prospective       | 14                                                  | 4                                                | 1                                    | 11                                             | 0                                                        |
| A5                                                                                                                     | Prospective       | 15                                                  | 11                                               | 5                                    | 9                                              | 0                                                        | R8                                                                                                                     | Prospective       | 15                                                  | 1                                                | 6                                    | 20                                             | 0                                                        |
| A6                                                                                                                     | Prospective       | 10                                                  | 4                                                | 5                                    | 11                                             | 0                                                        | R10                                                                                                                    | Prospective       | 17                                                  | 0                                                | 7                                    | 24                                             | 0                                                        |
| A7                                                                                                                     | Prospective       | 10                                                  | 0                                                | 0                                    | 10                                             | 0                                                        | R11                                                                                                                    | Prospective       | 21                                                  | 14                                               | 7                                    | 14                                             | 0                                                        |
| A8                                                                                                                     | Prospective       | 11                                                  | 0                                                | 5                                    | 16                                             | 0                                                        | R16                                                                                                                    | Prospective       | 11                                                  | 7                                                | 0                                    | 4                                              | (+1)                                                     |
| A9                                                                                                                     | Prospective       | 19                                                  | 2                                                | 2                                    | 19                                             | 0                                                        | R19                                                                                                                    | Prospective       | 11                                                  | 7                                                | 13                                   | 17                                             | 0                                                        |
| A10                                                                                                                    | Prospective       | 17                                                  | 0                                                | 7                                    | 24                                             | 0                                                        | R20                                                                                                                    | Prospective       | 14                                                  | 0                                                | 2                                    | 16                                             | 0                                                        |
| A11                                                                                                                    | Prospective       | 4                                                   | 2                                                | 3                                    | 5                                              | 0                                                        | R21                                                                                                                    | Prospective       | 2                                                   | 0                                                | 1                                    | 3                                              | 0                                                        |
| A12                                                                                                                    | Prospective       | 10                                                  | 1                                                | 0                                    | 9                                              | 0                                                        | R2                                                                                                                     | Retrospective     | 18                                                  | 0                                                | 1                                    | 19                                             | 0                                                        |
| A13                                                                                                                    | Prospective       | 4                                                   | 1                                                | 0                                    | 3                                              | 0                                                        | R3                                                                                                                     | Retrospective     | 17                                                  | 0                                                | 5                                    | 22                                             | 0                                                        |
| A14                                                                                                                    | Prospective       | 6                                                   | 1                                                | 0                                    | 5                                              | 0                                                        | R7                                                                                                                     | Retrospective     | 21                                                  | 1                                                | 11                                   | 31                                             | 0                                                        |
| A15                                                                                                                    | Prospective       | 28                                                  | 2                                                | 0                                    | 26                                             | 0                                                        | R9                                                                                                                     | Retrospective     | 10                                                  | 5                                                | 3                                    | 8                                              | (+1)                                                     |
| A16                                                                                                                    | Prospective       | 4                                                   | 0                                                | 4                                    | 8                                              | 0                                                        | R12                                                                                                                    | Retrospective     | 10                                                  | 0                                                | 10                                   | 20                                             | 0                                                        |
| A17                                                                                                                    | Prospective       | 10                                                  | 1                                                | 15                                   | 24                                             | 0                                                        | R13                                                                                                                    | Retrospective     | 11                                                  | 8                                                | 5                                    | 8                                              | 0                                                        |
| A19                                                                                                                    | Prospective       | 11                                                  | 0                                                | 0                                    | 11                                             | 0                                                        | R14                                                                                                                    | Retrospective     | 5                                                   | 0                                                | 3                                    | 8                                              | 0                                                        |
| A20                                                                                                                    | Prospective       | 2                                                   | 1                                                | 17                                   | 18                                             | 0                                                        | R15                                                                                                                    | Retrospective     | 16                                                  | 1                                                | 2                                    | 17                                             | 0                                                        |
| A21                                                                                                                    | Prospective       | 17                                                  | 0                                                | 3                                    | 20                                             | 0                                                        | R17                                                                                                                    | Retrospective     | 19                                                  | 3                                                | 7                                    | 23                                             | 0                                                        |
| A18                                                                                                                    | Retrospective     | 7                                                   | 6                                                | 2                                    | 3                                              | 0                                                        | R18                                                                                                                    | Retrospective     | 14                                                  | 1                                                | 0                                    | 13                                             | 0                                                        |
| A2                                                                                                                     | Unclear           | 9                                                   | 3                                                | 6                                    | 12                                             | 0                                                        | R5                                                                                                                     | Unclear           | 18                                                  | 2                                                | 0                                    | 16                                             | 0                                                        |
| <b>Total</b>                                                                                                           |                   | 231                                                 | 43                                               | 87                                   | 275                                            | 0                                                        | <b>Total</b>                                                                                                           |                   | 282                                                 | 55                                               | 90                                   | 317                                            | (+2)                                                     |
| Pre-specified but not reported (accept BMJ): 19% (43/231)<br>Reported but not pre-specified (accept BMJ): 32% (87/275) |                   |                                                     |                                                  |                                      |                                                |                                                          | Pre-specified but not reported (reject BMJ): 19% (55/282)<br>Reported but not pre-specified (reject BMJ): 28% (90/317) |                   |                                                     |                                                  |                                      |                                                |                                                          |

<sup>a</sup> Pre-specified: total number of outcomes listed in trial registry.

<sup>b</sup> Outcomes mentioned in trial registry but not reported on in the initial article submission.

<sup>c</sup> Outcomes not pre-specified in trial registry but reported on in the initial article submission.

<sup>d</sup> Reported: total number of outcomes reported in initial submission . If only an outcome domain was specified in the trial registry, all outcomes reported within this domain were counted.

<sup>e</sup> Minus (-), number of pre-specified trial registry outcomes downgraded from primary to secondary outcomes in initial trial report submission; Plus (+), number of pre-specified or trial registry outcomes upgraded from secondary to primary in the initial trial report submission.

**Supplementary Table 2: Outcome discrepancies between pre-specified (protocol) and reported outcomes (final published article) from trials published by The BMJ**

| Trials published by The BMJ (n=21 trials) |                                                                                                                        |                                                     |                                                  |                                      |                                                |                                                          |
|-------------------------------------------|------------------------------------------------------------------------------------------------------------------------|-----------------------------------------------------|--------------------------------------------------|--------------------------------------|------------------------------------------------|----------------------------------------------------------|
| Article ID                                | Registration type                                                                                                      | Discrepancy type                                    |                                                  |                                      |                                                |                                                          |
|                                           |                                                                                                                        | Total number of outcomes pre-specified <sup>a</sup> | Pre-specified outcomes not reported <sup>b</sup> | New outcomes introduced <sup>c</sup> | Total number of outcomes reported <sup>d</sup> | Change in level of importance of an outcome <sup>e</sup> |
| A1                                        | Prospective                                                                                                            | 15                                                  | 2                                                | 0                                    | 13                                             | 0                                                        |
| A3                                        | Prospective                                                                                                            | 11                                                  | 8                                                | 1                                    | 4                                              | 0                                                        |
| A4                                        | Prospective                                                                                                            | 21                                                  | 2                                                | 6                                    | 25                                             | (-1)                                                     |
| A5                                        | Prospective                                                                                                            | 23                                                  | 16                                               | 2                                    | 9                                              | 0                                                        |
| A6                                        | Prospective                                                                                                            | 12                                                  | 5                                                | 4                                    | 11                                             | (-1)                                                     |
| A7                                        | Prospective                                                                                                            | 10                                                  | 0                                                | 0                                    | 10                                             | 0                                                        |
| A8                                        | Prospective                                                                                                            | 14                                                  | 0                                                | 2                                    | 16                                             | 0                                                        |
| A9                                        | Prospective                                                                                                            | 25                                                  | 7                                                | 2                                    | 20                                             | 0                                                        |
| A10                                       | Prospective                                                                                                            | 22                                                  | 3                                                | 5                                    | 24                                             | 0                                                        |
| A11                                       | Prospective                                                                                                            | 5                                                   | 2                                                | 2                                    | 5                                              | 0                                                        |
| A12                                       | Prospective                                                                                                            | 10                                                  | 1                                                | 0                                    | 9                                              | 0                                                        |
| A13                                       | Prospective                                                                                                            | 3                                                   | 0                                                | 0                                    | 3                                              | 0                                                        |
| A14                                       | Prospective                                                                                                            | 5                                                   | 0                                                | 0                                    | 5                                              | 0                                                        |
| A15                                       | Prospective                                                                                                            | 29                                                  | 3                                                | 0                                    | 26                                             | 0                                                        |
| A16                                       | Prospective                                                                                                            | 8                                                   | 0                                                | 0                                    | 8                                              | 0                                                        |
| A17                                       | Prospective                                                                                                            | 22                                                  | 0                                                | 3                                    | 25                                             | 0                                                        |
| A19                                       | Prospective                                                                                                            | 13                                                  | 2                                                | 0                                    | 11                                             | 0                                                        |
| A20                                       | Prospective                                                                                                            | 41                                                  | 4                                                | 1                                    | 38                                             | (-1)                                                     |
| A21                                       | Prospective                                                                                                            | 21                                                  | 1                                                | 0                                    | 20                                             | 0                                                        |
| A18                                       | Retrospective                                                                                                          | 7                                                   | 6                                                | 2                                    | 3                                              | 0                                                        |
| A2                                        | Unclear                                                                                                                | 16                                                  | 9                                                | 2                                    | 9                                              | 0                                                        |
| <b>Total</b>                              |                                                                                                                        | 333                                                 | 71                                               | 32                                   | 294                                            | (-3)                                                     |
|                                           | Pre-specified but not reported (accept BMJ): 21% (71/333)<br>Reported but not pre-specified (accept BMJ): 11% (32/294) |                                                     |                                                  |                                      |                                                |                                                          |

<sup>a</sup> Pre-specified: total number of outcomes listed in trial protocol.

<sup>b</sup> Outcomes mentioned in protocol but not reported on in the final published article.

<sup>c</sup> Outcomes not pre-specified in protocol but reported in the final published article.

<sup>d</sup> Reported: total number of outcomes reported in the final published article . If only an outcome domain was specified in the protocol, all outcomes reported within this domain were counted.

<sup>e</sup> Minus (-), number of pre-specified protocol outcomes downgraded from primary to secondary outcomes in final published article; Plus (+), number of pre-specified or protocol outcomes upgraded from secondary to primary in the final published article.
